1 **Characterization of the SARS-CoV-2 BA.5.5 and BQ.1.1 Omicron Variants in**  
2 **Mice and Hamsters.**

3  
4 James Brett Case<sup>1\*</sup>, Suzanne M. Scheaffer<sup>1\*</sup>, Tamarand L. Darling<sup>1</sup>, Traci L. Bricker<sup>1</sup>, Lucas J.  
5 Adams<sup>2</sup>, Houda Harastani<sup>1</sup>, Reed Trende<sup>1</sup>, Shilpa Sanapala<sup>1</sup>, Daved H. Fremont<sup>2,3,4</sup>, Adrianus C.  
6 M. Boon<sup>1,2,3,†</sup> and Michael S. Diamond<sup>1,2,3,5,6,†</sup>

7  
8 <sup>1</sup>Department of Medicine, Washington University School of Medicine, St. Louis, MO.

9 <sup>2</sup>Department of Pathology & Immunology, Washington University School of Medicine, St.  
10 Louis, MO.

11 <sup>3</sup>Department of Molecular Microbiology, Washington University School of Medicine, St. Louis,  
12 MO.

13 <sup>4</sup>Department of Biochemistry and Molecular Biophysics, Washington University School of  
14 Medicine, St. Louis, MO.

15 <sup>5</sup>Andrew M. and Jane M. Bursky Center for Human Immunology and Immunotherapy Programs,  
16 Washington University School of Medicine, Saint Louis, MO.

17 <sup>6</sup>Center for Vaccines and Immunity to Microbial Pathogens, Washington University School of  
18 Medicine, Saint Louis, MO.

19  
20 **\* These authors contributed equally.**

21 † **Corresponding authors:** Michael S. Diamond, M.D., Ph.D., [mdiamond@wustl.edu](mailto:mdiamond@wustl.edu) and  
22 Adrianus C.M. Boon, [jboon@wustl.edu](mailto:jboon@wustl.edu)

23  
24 **Keywords: SARS-CoV-2, coronavirus, pathogenesis, BA.5.5, BQ.1.1, variants**

25 **ABSTRACT**

26           The continued evolution and emergence of novel SARS-CoV-2 variants has resulted in  
27 challenges to vaccine and antibody efficacy. The emergence of each new variant necessitates the  
28 need to re-evaluate and refine animal models used for countermeasure testing. Here, we tested a  
29 currently circulating SARS-CoV-2 Omicron lineage variant, BQ.1.1, in multiple rodent models  
30 including K18-hACE2 transgenic, C57BL/6J, and 129S2 mice, and Syrian golden hamsters. In  
31 contrast to a previously dominant BA.5.5 Omicron variant, inoculation of K18-hACE2 mice with  
32 BQ.1.1 resulted in a substantial weight loss, a characteristic seen in pre-Omicron variants.  
33 BQ.1.1 also replicated to higher levels in the lungs of K18-hACE2 mice and caused greater lung  
34 pathology than the BA.5.5 variant. However, C57BL/6J mice, 129S2 mice, and Syrian hamsters  
35 inoculated with BQ.1.1 showed no differences in respiratory tract infection or disease compared  
36 to animals administered BA.5.5. Airborne or direct contact transmission in hamsters was  
37 observed more frequently after BQ.1.1 than BA.5.5 infection. Together, these data suggest that  
38 the BQ.1.1 Omicron variant has increased virulence in some rodent species, possibly due to the  
39 acquisition of unique spike mutations relative to other Omicron variants.

40

41 **IMPORTANCE**

42           As SARS-CoV-2 continues to evolve, there is a need to rapidly assess the efficacy of  
43 vaccines and antiviral therapeutics against newly emergent variants. To do so, the commonly  
44 used animal models must also be reevaluated. Here, we determined the pathogenicity of the  
45 circulating BQ.1.1 SARS-CoV-2 variant in multiple SARS-CoV-2 animal models including  
46 transgenic mice expressing human ACE2, two strains of conventional laboratory mice, and  
47 Syrian hamsters. While BQ.1.1 infection resulted in similar levels of viral burden and clinical

48 disease in the conventional laboratory mice tested, increases in lung infection were detected in  
49 human ACE2-expressing transgenic mice, which corresponded with greater levels of pro-  
50 inflammatory cytokines and lung pathology. Moreover, we observed a trend towards greater  
51 animal-to-animal transmission of BQ.1.1 than BA.5.5 in Syrian hamsters. Together, our data  
52 highlight important differences in two closely related Omicron SARS-CoV-2 variant strains and  
53 provide a foundation for evaluating countermeasures.

## 54 INTRODUCTION

55 The COVID-19 pandemic caused by severe acute respiratory syndrome coronavirus 2  
56 (SARS-CoV-2) is now in its third year. While major advances have been made in understanding  
57 the biology of SARS-CoV-2, the efficacy of existing vaccines and therapeutics has been  
58 challenged by the continued evolution of the virus spike glycoprotein. In late 2021, the first  
59 Omicron (BA.1) variant emerged, which encoded a greater number of spike mutations than  
60 previously detected variants (> 30 mutations relative to WA1/2020). Despite the considerable  
61 escape from natural, hybrid, and vaccine-induced immunity in humans, BA.1 caused attenuated  
62 infection and disease in mice, hamsters, and non-human primates (1-3). Subsequently, the BA.1  
63 variant split into multiple lineages (BA.2 – 2.75, BA.4, and BA.5), each encoding a unique set of  
64 mutations. Since October of 2022, cases of the BQ.1.1 variant, a descendent of the BA.5 lineage,  
65 have steadily increased. Relative to BA.5.5, BQ.1.1 encodes only four differences in the spike  
66 protein (I76T, R346T, K444T, and N460K) (4).

67 Here, we evaluated the pathogenesis of the SARS-CoV-2 BQ.1.1 variant relative to the  
68 closely related, but genetically distinct, BA.5.5 variant in commercially available mouse strains  
69 and Syrian golden hamsters that have been used previously as models of SARS-CoV-2  
70 pathogenesis. For each mouse model, we assessed clinical disease and the levels of viral  
71 infection. Using a hamster model, we also evaluated the relative transmissibility of BA.5.5 and  
72 BQ.1.1. Finally, we used *in vitro* protein-protein interaction assays to investigate whether the  
73 disparities in pathogenesis we observed between variants might be explained by differences in  
74 RBD-receptor interactions.

75 **RESULTS**

76 ***BQ.1.1 infection in C57BL/6J, 129S2, and K18-hACE2 mice.*** The naturally occurring  
77 SARS-CoV-2 spike N501Y mutation enables engagement of endogenous murine ACE2 and  
78 productive infection of wild-type C57BL/6J and 129S2 mice (5-9). Nonetheless, C57BL/6J,  
79 129S2, and BALB/c mice inoculated with an earlier Omicron variant strain (BA.1) that has the  
80 N501Y mutation sustained low levels of viral infection and no clinical disease (1). To determine  
81 the pathogenicity of the newly emerged BQ.1.1 variant in these laboratory strains of mice, we  
82 inoculated 8- to 10-week-old female C57BL/6J or 16-week-old male 129S2 mice with  $10^4$  FFU  
83 of BA.5.5 or BQ.1.1. For both C57BL/6J and 129S2 mice, weight loss was not observed after  
84 inoculation with BA.5.5 or BQ.1.1 over a four-day period (**Fig 1A-B**), consistent with  
85 phenotypes observed with other Omicron strains (1). On day 4 post-infection (dpi), tissues were  
86 collected, and the levels of viral infection were determined. In C57BL/6J mice, viral RNA levels  
87 in the nasal washes, nasal turbinates, and lungs of animals infected with BA.5.5 or BQ.1.1 were  
88 at or barely above the limit of detection, and infectious virus was not recovered from the lungs  
89 (**Fig 1A**). Although viral RNA levels in the nasal washes of 129S2 mice were barely detectable  
90 (**Fig 1B**), appreciable amounts of BA.5.5 and BQ.1.1 RNA were measured in the lungs and nasal  
91 turbinates, with ~11-fold ( $P < 0.0001$ ) higher amounts of viral RNA in the lung after BA.5.5  
92 infection. Nonetheless, infectious virus recovered from the lungs of 129S2 mice was at or just  
93 above the limit of detection.

94 We next tested the capacity of BQ.1.1 and BA.5.5 to infect K18-hACE2 transgenic mice,  
95 which are a model of severe disease and pathogenesis for most SARS-CoV-2 strains (10, 11),  
96 with the exception of some Omicron isolates (*e.g.*, BA.1 and BA.2) that are attenuated (1, 5, 10).  
97 After inoculation with  $10^4$  FFU, BQ.1.1, but not BA.5.5, resulted in greater than 15% loss in

98 body-weight beginning at 3 dpi (**Fig 1C**). BQ.1.1 infection also resulted in a 3-fold ( $P < 0.05$ )  
99 increase in viral RNA and 33-fold ( $P < 0.0001$ ) increase in infectious virus in the lung compared  
100 to the BA.5.5 strain. In the nasal washes and nasal turbinates, comparable levels of viral RNA  
101 were observed for both strains. These data suggest the BQ.1.1 variant has an increased capacity  
102 to infect the lungs of hACE2-expressing mice, and this correlates with clinical disease as  
103 reflected by weight loss.

104 ***BQ.1.1 infection causes increased lung inflammation and pathology in K18-hACE2***  
105 ***mice.*** Previous reports showed that infection of K18-hACE2 mice with the BA.1 strain did not  
106 induce substantive pro-inflammatory cytokine/chemokine responses in the lung (1). Given the  
107 capacity of BA.5.5 and BQ.1.1 to replicate in the lungs of K18-hACE2 mice, we quantified the  
108 levels of pro-inflammatory cytokines and chemokines present at 6 dpi (**Fig 2A-B**). While  
109 increased levels of pro-inflammatory cytokines and chemokines were present in lung  
110 homogenates of BA.5.5 or BQ.1.1-infected compared to uninfected mice, many (*e.g.*, G-CSF,  
111 IL-17, LIF, CCL2, CXCL9, CCL3, and CCL4) were expressed at higher levels in BQ.1.1- than  
112 BA.5.5-infected mice. These data suggest that the increased viral replication in the lungs of  
113 BQ.1.1-infected K18-hACE2 mice resulted in greater production of pro-inflammatory mediators.

114 To determine the impact of the differences in viral burden and cytokines on lung injury,  
115 we performed histopathological analysis of lung tissues using hematoxylin and eosin staining  
116 (**Fig 2C-F**). Lungs isolated from K18-hACE2 mice at 6 dpi with BA.5.5 showed limited immune  
117 cell infiltration or lung injury. In contrast, BQ.1.1-infected lungs showed evidence of pneumonia  
118 with increased numbers of inflammatory lesions characterized by immune cell infiltrates,  
119 alveolar space consolidation, vascular congestion, and interstitial edema (**Fig 2C-D**). As

120 expected, lung tissues isolated from C57BL/6J and 129S2 mice infected with BA.5.5 or BQ.1.1  
121 showed no evidence of lung pathology (**Fig 2E-F**).

122 ***BA.5.5. and BQ.1.1 infection and transmission in Syrian hamsters.*** We evaluated the  
123 pathogenicity and transmissibility of BA.5.5 and BQ.1.1 in Syrian hamsters. Animals were  
124 inoculated with  $2.5 \times 10^4$  PFU of BA.5.5 or BQ.1.1, weights were measured daily, and at 3 or 6  
125 dpi, tissues were collected to assess viral infection (**Fig 3A**). Compared to initial weights at the  
126 time of inoculation, BA.5.5 and BQ.1.1 did not cause weight loss in hamsters over a 14-day  
127 period and had only small, non-significant trends, in weight gain (**Fig 3B**). Viral RNA levels in  
128 tissues were generally highest at 3 dpi (**Fig 3C**). Between the two variants, the amounts of viral  
129 RNA were comparable with the exception of nasal turbinates at 3 dpi, which showed higher (7.5-  
130 fold,  $P < 0.01$ ) BA.5.5 levels than BQ.1.1. In a second analysis of infectious virus by plaque  
131 assay, higher (81- and 51-fold,  $P < 0.01$ ) levels of BA.5.5 were detected at 3 dpi in the nasal  
132 washes and nasal turbinates but not in the lungs (**Fig 3D**). These data demonstrate that direct  
133 inoculation of hamsters with BA5.5 or BQ.1.1 results in similar levels of infection and weight  
134 loss, with BA.5.5 exhibiting slightly greater viral burden than BQ.1.1 in the upper respiratory  
135 tract.

136 Unlike mice, the SARS-CoV-2 pathogenesis in Syrian hamsters also allows for  
137 assessment of viral transmission from animal-to-animal (12, 13). We evaluated the capacity of  
138 BA.5.5 and BQ.1.1 to transmit to naïve hamsters via direct contact or airborne transmission (**Fig**  
139 **4A-B**). Donor hamsters were inoculated with  $2.5 \times 10^4$  PFU of BA.5.5 or BQ.1.1. At 24 h post-  
140 infection, donor animals were transferred to cages containing naïve animals for 8 h of either  
141 direct contact or placed inside porous stainless-steel isolation canisters with directional airflow  
142 from the donor animal to the naïve animal for airborne transmission. After the 8 h period, donor

143 and contact animals were separated, returned to individual caging, and respiratory tissues were  
144 collected 4 days later for detection of infectious virus. Whereas BA.5.5 was transmitted  
145 approximately 67% (4 of 6 animals) of the time under direct contact conditions, airborne  
146 transmission was not observed (0 of 8 animals) for this variant (**Fig 4C-E**). In contrast, BQ.1.1  
147 was transmitted to recipient animals at frequencies of 100% (6 of 6 animals) and 17% (1 of 6  
148 animals) in direct contact and airborne settings, respectively (**Fig 4C-E**). The difference in direct  
149 contact or airborne transmission between the two variants of SARS-CoV-2 was not statistically  
150 significant, but trended toward greater transmission of BQ.1.1.

151 *Binding affinities of SARS-CoV-2 BA.5.5 and BQ.1.1 RBDs for human and mouse*  
152 *ACE2*. As the SARS-CoV-2 spike protein has evolved in variant strains, differences in binding  
153 affinity for hACE2 have been observed (14-16). Since we observed an elevated lung viral burden  
154 for BQ.1.1 in K18-hACE2 mice, which express high levels of hACE2 in epithelial cells (10, 17),  
155 but not in C57BL/6J or 129S2 mice, which express mouse ACE2 but not hACE2, we performed  
156 biolayer interferometry (BLI) experiments to quantify RBD-ACE2 binding interactions (**Fig 5A-**  
157 **C**). For BA.5.5 and BQ.1.1 RBDs, the affinities for hACE2 were similar in the low nanomolar-  
158 range (6.06 and 4.4 nM, respectively). In contrast, the affinity of BQ.1.1 for mouse ACE2  
159 (mACE2) was more than 5-fold higher than BA.5.5 (23 versus 121 nM, respectively). Thus, the  
160 increased viral burden observed during BQ.1.1 infection in K18-hACE2, but not C57BL/6J or  
161 129S2 mice, is likely not explained by altered affinity of binding to hACE2.



162 **DISCUSSION**

163 In this study, we compared the pathogenicity of a circulating SARS-CoV-2 Omicron  
164 variant BQ.1.1 to the closely related BA.5.5 variant, the latter of which is rapidly diminishing in  
165 prevalence (4). Our experiments highlight phenotypic differences among Omicron variant strains  
166 in different animal models commonly used for countermeasure testing. For instance, infection  
167 with BA.1 and BA.2 Omicron variant strains results in decreased infection and attenuated  
168 disease in mice and hamsters (1, 14). Our studies showed that BQ.1.1 infection of K18-hACE2  
169 transgenic mice resulted in weight loss that was similar to that seen with of pre-Omicron SARS-  
170 CoV-2 variants including WA1/2020 D614G, B.1.1.7, and B.1.351 (5, 18), whereas, BA.5.5  
171 infection did not result in weight loss regardless of the model tested. While the exact mechanism  
172 of selective BQ.1.1-, but not BA5.5-induced weight loss in K18-hACE2 mice remains to be  
173 determined, it may be due in part to the relatively higher levels of infection and inflammation,  
174 which correlate with clinical disease progression in K18-hACE2 mice (11).

175 We observed increased viral burden and pathogenicity in the lungs of BQ.1.1-infected  
176 K18-hACE2 mice compared to BA.5.5-infected animals. One potential mechanism that may, in  
177 part, explain this observation is differences in mouse and human ACE2 receptor affinity due to  
178 the mutations present in BQ.1.1, but not BA.5.5, spike proteins (I76T, R346T, K444T, and  
179 N460K). Indeed, a recent report suggested that BQ.1.1 RBD had increased affinity for hACE2 in  
180 a yeast surface display assay (1.5-fold), and this correlated with greater cell infectivity and  
181 fusogenicity *in vitro* compared to BA.5 (19). In agreement with these data, our BLI results  
182 showed that BQ.1.1 RBD had a 1.5-fold greater affinity for hACE2 than BA.5.5, suggesting a  
183 mechanism that might contribute to and/or explain the phenotypic differences in K18-hACE2  
184 mice. Reverse genetic experiments with amino acid substituted BA.5 RBDs suggest that the

185 R346T mutation alone is sufficient to enhance affinity for hACE2, whereas R346T and N460K  
186 are required to increase *in vitro* cell infectivity (19). Nonetheless, amino acid differences in other  
187 structural and nonstructural proteins apart from spike (*e.g.*, nsp2: Q376K, nsp6: L260F, nsp12:  
188 Y273H, nsp13: M233I, N268S, and N: E136D) also might play a role. This hypothesis that  
189 amino acid substitutions outside of spike may be important in distinguishing BA.5.5 and BQ.1.1  
190 infectivity is supported by our observation that a 5-fold increase in BQ.1.1 RBD affinity for  
191 mACE2 was insufficient to promote greater infection of C57BL/6J and 129S2 mice compared to  
192 BA.5.5. Furthermore, the observation of a trend toward increased transmissibility for BQ.1.1  
193 relative to BA.5.5 in hamsters suggests that more studies in animal models and humans are  
194 needed to fully discern differences in pathogenesis for these and other SARS-CoV-2 variants.

195 **Limitations of study.** Several limitations exist in our study: (1) We evaluated three  
196 mouse strains and a single Syrian hamster model of SARS-CoV-2 disease. Although these  
197 animal models are used extensively in studying SARS-CoV-2 pathogenesis and  
198 countermeasures, future testing of the virulence of BQ.1.1 and BA.5.5 in non-human primates  
199 will be important; (2) While the hamster transmission model is useful, it will be important to  
200 corroborate our BQ.1.1 transmission findings in humans as data becomes available; (3) All of  
201 our studies were performed in naïve animals, which does not address the relative immune  
202 evasive potential of BQ.1.1 and BA.5.5, a key question given that most of the global population  
203 has been infected or immunized; and (4) We did not evaluate even newer strains of the XBB.1  
204 lineage. During the latter stages of our study, cases of SARS-CoV-2 associated with the XBB  
205 lineage have increased substantially. Future studies are needed to compare the pathogenicity,  
206 transmissibility, and immune evasive potential of XBB and BQ.1.1 strains in animal models and  
207 humans.



209 **ACKNOWLEDGEMENTS**

210 This study was supported by the NIH (R01 AI157155, NIAID Centers of Excellence for  
211 Influenza Research and Response (CEIRR) contracts 75N93021C00014 and 75N93019C00051,  
212 to M.S.D., 75N93021C00016 to A.C.M.B, and 75N93022C00035 and 75N93019C00062 to  
213 D.H.F. J.B.C is supported by a Moderna Global Fellowship award. We thank Aaron Schmidt and  
214 Catherine Jacob-Dolan for sharing the BQ.1.1 RBD protein used for BLI studies, and Mehul  
215 Suthar and Andrew Pekosz for BA.5.5 and BQ.1.1 isolates, respectively. Some figure designs  
216 were created using BioRender.com.

217

218 **AUTHOR CONTRIBUTIONS**

219 J.B.C. and S.M.S. performed mouse experiments and viral burden analyses. S.M.S.  
220 propagated and validated SARS-CoV-2 viruses. T.L.D., T.L.B., H.H., and R.T. performed  
221 hamster experiments. T.L.D., T.L.B., and H.H. performed hamster viral burden analyses. L.J.A.,  
222 J.B.C., and S.S. performed BLI experiments. S.S. performed histopathology scoring. D.H.F.,  
223 A.C.M.B, and M.S.D. obtained funding and supervised the research. J.B.C. and M.S.D. wrote the  
224 initial draft, with the other authors providing editorial comments.

225

226 **COMPETING FINANCIAL INTERESTS**

227 M.S.D. is a consultant for Inbios, Vir Biotechnology, Ocugen, Topspin, Moderna, and  
228 Immunome. The Diamond laboratory has received unrelated funding support in sponsored  
229 research agreements from Vir Biotechnology, Emergent BioSolutions, Generate Biomedicines,  
230 and Moderna. The Boon laboratory has received unrelated funding support in sponsored research

231 agreements from GreenLight Biosciences Inc., Moderna, and AbbVie Inc. All other authors

232 declare no competing financial interests.

233

234 **FIGURE LEGENDS**

235 **Figure 1. BQ.1.1-infection results in increased infection and weight loss in K18-**  
236 **hACE2 mice.** C57BL/6J (A), 129S2 (B), or K18-hACE2 (C) mice were inoculated intranasally  
237 with  $10^4$  FFU of the indicated SARS-CoV-2 strain. Animals were monitored for weight loss (A-  
238 C) daily (differences in area under the curves assessed by student's t-test with Welch's  
239 correction; \*\*  $P < 0.01$ ). At 4 or 6 dpi, the indicated tissues were collected. Viral RNA levels in  
240 the lungs, nasal turbinates, and nasal washes were determined by RT-qPCR, and infectious virus  
241 in the lungs were quantified by plaque assay (lines indicate median  $\pm$  SEM., dotted lines indicate  
242 limits of detection;  $n = 9-10$  mice per group, two experiments; Mann-Whitney test between  
243 BA.5.5- and BQ.1.1-infected groups; \*  $P < 0.05$ , \*\*\*\*,  $P < 0.0001$ ).

244 **Figure 2. BQ.1.1 infection induces inflammatory cytokines and pathology in the**  
245 **lungs of K18-hACE2 mice.** (A) Heat map of cytokine and chemokine protein expression levels  
246 in lung homogenates. Data from BQ.1.1-infected mice are presented as  $\log_2$ -transformed fold-  
247 change compared to BA.5.5-infected mice. White, baseline; red, increase. (B) Graphs of cytokine  
248 and chemokine protein levels in the lungs of naïve, BA.5.5, or BQ.1.1-infected lungs from K18-  
249 hACE2 mice at 6 dpi (line indicates median, dotted lines indicate limits of detection;  $n = 2-3$   
250 naïve,  $n = 9-10$  for all other groups (two-way ANOVA with Tukey's post-test with comparisons  
251 between all groups: \*,  $P < 0.05$ , \*\*,  $P < 0.01$ , \*\*\*,  $P < 0.001$ , \*\*\*\*,  $P < 0.0001$ ). (C)  
252 Inflammatory foci from mice in D-F were quantified blindly and plotted (Mann-Whitney test  
253 between BA.5.5- and BQ.1.1-infected groups; \*  $P < 0.05$ ). (D-F) Hematoxylin and eosin staining  
254 of lung sections from K18-hACE2, C57BL/6J, and 129S2 mice collected six days after intranasal  
255 inoculation with  $10^4$  PFU of the indicated SARS-CoV-2 strain. Images show 2.5x (left), 5x  
256 (middle), and 20x (right) power magnification. Scale bars indicate 500  $\mu\text{m}$ , 500  $\mu\text{m}$ , and 100  $\mu\text{m}$ ,

257 left-to-right, respectively. Two representative images are shown from four mice per group  
258 harvested from two experiments.

259 **Figure 3. BA.5.5 and BQ.1.1 infections of Syrian hamsters.** Hamsters were inoculated  
260 intranasally with  $2.5 \times 10^4$  PFU of the indicated SARS-CoV-2 strain (**A**). Naïve and BA.5.5 or  
261 BQ.1.1-inoculated animals were monitored for weight change daily for 14 days (**B**). At 3 or 6  
262 dpi, the nasal washes, nasal turbinates, and lungs, were collected from each animal and levels of  
263 viral RNA and infectious virus were determined by RT-qPCR (**C**) or plaque assay (**D**),  
264 respectively (lines indicate median  $\pm$  SEM., dotted lines indicate limits of detection; n = 6-  
265 7 hamsters per group per timepoint, two experiments; Mann-Whitney test between BA.5.5- and  
266 BQ.1.1-infected groups; \*  $P < 0.05$ , \*\*  $P < 0.01$ ).

267 **Figure 4. BA.5.5 and BQ.1.1 transmission in Syrian hamsters.** For transmission  
268 studies, donor hamsters were inoculated intranasally with  $2.5 \times 10^4$  PFU of the indicated SARS-  
269 CoV-2 strain. At 24 h post-inoculation, animals were transferred to cages containing naïve  
270 contact animals (direct contact; **A**) or porous canisters (airborne; **B**) upwind of naïve contact  
271 animals for a total exposure time of 8 h. After exposure, animals were returned to individual  
272 cages. At 4 days post-exposure, the percentage of SARS-CoV-2 positive contact hamsters were  
273 quantified (**C** and **D**). Nasal washes, nasal turbinates, and lungs, were collected from contact  
274 animals and levels of infectious virus were determined (**E**) (lines indicate median  $\pm$  SEM., dotted  
275 lines indicate limits of detection; n = 6-7 hamsters per group, two experiments). Positive  
276 transmission events were registered when infectious virus was detected above the limit of  
277 detection within any tissue for a given animal.

278 **Figure 5. Determination of ACE2-BA.5.5/BQ.1.1 RBD binding affinity by BLI.**  
279 Recombinant human (**A**) or mouse (**B**) ACE2-Fc proteins were loaded onto biolayer

280 interferometry (BLI) protein G pins at a concentration of 10  $\mu\text{g/mL}$  and dipped into the indicated  
281 concentrations of BA.5.5 or BQ.1.1 RBDs. Samples were allowed to associate and dissociate for  
282 300 s and 600 s, respectively. Dashed black curves show fits to a 1:1 binding model with a  
283 drifting baseline. (C) Association rate ( $k_a$ ), dissociation rate ( $k_d$ ), and kinetic dissociation  
284 constant ( $K_D$ ) values were calculated and reported.  
285



286 **METHODS**

287 **Cells.** Vero-TMPRSS2 (20) and Vero-hACE2-TMPRSS2 (21) cells were cultured at  
288 37°C in Dulbecco's Modified Eagle medium (DMEM) supplemented with 10% fetal bovine  
289 serum (FBS), 10 mM HEPES pH 7.3, 1 mM sodium pyruvate, 1× non-essential amino acids,  
290 and 100 U/ml of penicillin–streptomycin. Vero-TMPRSS2 cells were supplemented with 5  
291 µg/mL of blasticidin. Vero-hACE2-TMPRSS2 cells were supplemented with 10 µg/mL of  
292 puromycin. All cells routinely tested negative for mycoplasma using a PCR-based assay.

293 **Viruses.** The BA.5.5 (hCoV-19/USA/COR-22-063113/2022) and BQ.1.1 strains (hCoV-  
294 19/USA/CA-Stanford-79\_S31/2022) were obtained from nasopharyngeal isolates as generous  
295 gifts of Andrew Pekosz (Johns Hopkins School of Public Health) and Mehul Suthar (Emory  
296 University), respectively. All virus stocks were generated in Vero-TMPRSS2 cells and subjected  
297 to next-generation sequencing as described previously (21) to confirm the presence and stability  
298 of expected substitutions. All virus experiments were performed in an approved biosafety level 3  
299 (BSL-3) facility.

300 **Mouse experiments.** Animal studies were carried out in accordance with the  
301 recommendations in the Guide for the Care and Use of Laboratory Animals of the National  
302 Institutes of Health. The protocols were approved by the Institutional Animal Care and Use  
303 Committee at the Washington University School of Medicine (assurance number A3381–01).  
304 Virus inoculations were performed under anesthesia that was induced and maintained with  
305 ketamine hydrochloride and xylazine, and all efforts were made to minimize animal suffering.

306 Heterozygous K18-hACE2 C57BL/6J mice (strain: 2B6.Cg-Tg(K18-ACE2)2PrImn/J),  
307 and wild-type C57BL/6J (strain: 000664) were obtained from The Jackson Laboratory. 129S2  
308 mice (strain: 129S2/SvPasCrl) were obtained from Charles River Laboratories. All animals were

309 housed in groups and fed standard chow diets. For mouse experiments, eight- to ten-week-old  
310 female K18-hACE2 and C57BL/6J mice or 16-week-old male 129S2 mice were administered the  
311 indicated doses of the respective SARS-CoV-2 strains by intranasal administration. *In vivo*  
312 studies were not blinded, and mice were randomly assigned to treatment groups. No sample-size  
313 calculations were performed to power each study. Instead, sample sizes were determined based  
314 on prior *in vivo* virus challenge experiments.

315 **Measurement of viral RNA levels.** Tissues were weighed and homogenized with  
316 zirconia beads in a MagNA Lyser instrument (Roche Life Science) in 1 mL of DMEM medium  
317 supplemented with 2% heat-inactivated FBS. Tissue homogenates were clarified by  
318 centrifugation at 10,000 rpm for 5 min and stored at  $-80^{\circ}\text{C}$ . RNA was extracted using the  
319 MagMax mirVana Total RNA isolation kit (Thermo Fisher Scientific) on the Kingfisher Flex  
320 extraction robot (Thermo Fisher Scientific). RNA was reverse transcribed and amplified using  
321 the TaqMan RNA-to-CT 1-Step Kit (Thermo Fisher Scientific). Reverse transcription was  
322 carried out at  $48^{\circ}\text{C}$  for 15 min followed by 2 min at  $95^{\circ}\text{C}$ . Amplification was accomplished over  
323 50 cycles as follows:  $95^{\circ}\text{C}$  for 15 s and  $60^{\circ}\text{C}$  for 1 min. Copies of SARS-CoV-2 *N* gene RNA in  
324 samples were determined using a previously published assay (22). Briefly, a TaqMan assay was  
325 designed to target a highly conserved region of the *N* gene (Forward primer:  
326 ATGCTGCAATCGTGCTACAA; Reverse primer: GACTGCCGCCTCTGCTC; Probe: /56-  
327 FAM/TCAAGGAAC/ZEN/AACATTGCCAA/3IABkFQ/). This region was included in an RNA  
328 standard to allow for copy number determination down to 10 copies per reaction. The reaction  
329 mixture contained final concentrations of primers and probe of 500 and 100 nM, respectively.

330 **Viral plaque assay.** Vero-TMPRSS2-hACE2 cells were seeded at a density of  $1 \times 10^5$   
331 cells per well in 24-well tissue culture plates. The following day, medium was removed and

332 replaced with 200  $\mu$ L of material to be titrated diluted serially in DMEM supplemented with 2%  
333 FBS. One hour later, 1 mL of methylcellulose overlay was added. Plates were incubated for 72 h,  
334 then fixed with 4% paraformaldehyde (final concentration) in PBS for 20 min. Plates were  
335 stained with 0.05% (w/v) crystal violet in 20% methanol and washed twice with distilled,  
336 deionized water.

337 **Hamster experiments.** Five-six-week-old male hamsters were obtained from Charles  
338 River Laboratories and directly transferred into an enhanced animal biosafety level 3 laboratory  
339 (ABSL-3+). Hamsters were challenged via the intranasal route with  $2.5 \times 10^4$  PFU of SARS-  
340 CoV-2 BA.5.5 or BQ.1.1. Twenty-four hours after challenge, naïve contact hamsters were  
341 exposed to the directly inoculated (donor) hamsters. Potential virus exposure was either airborne,  
342 wherein the donor and contact hamsters were placed in individual porous stainless-steel isolation  
343 canisters with directional airflow coming from the donor cage, or through direct contact, wherein  
344 the contact hamster was placed directly into the donor cage. Upon eight hours of exposure, the  
345 contact hamsters were returned to their original cages. Hamsters directly inoculated were  
346 weighed daily and harvested at three- or six-days post-inoculation. Contact hamsters were  
347 harvested at four days post exposure. At time of harvest, the left lung lobe, nasal wash, and nasal  
348 turbinate of each animal was collected. The nasal wash was collected with 1 mL of PBS  
349 supplemented to contain 0.1% BSA and subsequently clarified at 1,200 rpm for ten minutes at  
350 4°C. The left lung lobe was homogenized in 1.0 mL DMEM and clarified by centrifugation  
351 1,000 x g for 5 min. Nasal turbinates were collected by removing the skin along the nose and  
352 cheeks followed by cutting the jaw to expose the upper palate. A sagittal incision through the  
353 palate exposed the nasal turbinates which were then removed using blunt forceps. The nasal  
354 turbinates were homogenized in 1.0 mL of DMEM supplemented with 2% FBS, 10mM HEPES

355 (pH 7.3) and 2 mM L-glutamine and clarified by centrifugation 1,000 x g for 5 min. The nasal  
356 wash, lung and nasal turbinates were used for viral titer analysis by quantitative RT-PCR using  
357 primers and probes targeting the N gene, and by plaque assay. Infectious viral titer detected in  
358 any of the contact hamster tissues was considered a positive transmission event.

359 **Cytokine and chemokine protein measurements.** Lung homogenates were incubated  
360 with Triton-X-100 (1% final concentration) for 1 h at room temperature to inactivate SARS-  
361 CoV-2. Homogenates were analyzed for cytokines and chemokines by Eve Technologies  
362 Corporation (Calgary, AB, Canada) using their Mouse Cytokine Array/Chemokine Array  
363 platform.

364 **Lung pathology.** Animals were euthanized before harvest and fixation of tissues. Briefly,  
365 lungs were inflated with approximately 1.2 mL of 4% paraformaldehyde using a 3-mL syringe  
366 and catheter inserted into the trachea. Tissues were allowed to fix for 24 h at room temperature,  
367 embedded in paraffin, and sections were stained with hematoxylin and eosin. Slides were  
368 scanned using a Hamamatsu NanoZoomer slide scanning system, and the images were viewed  
369 using NDP view software (ver.1.2.46). Inflammatory lesions were quantified blindly.

370 **Binding analysis by biolayer interferometry.** BLI was used to quantify the binding of  
371 BA.5.5 and BQ.1.1 SARS-CoV-2 RBDs to recombinant human or mouse ACE2 proteins. Fc  
372 conjugated human and mouse ACE2 proteins were expressed and purified as previously  
373 described (23). Subsequently, 10 µg/mL of each protein was immobilized onto protein G  
374 biosensors (GatorBio) for 3 min. After a 30 s wash, the pins were submerged in running buffer  
375 (10 mM HEPES, 150 mM NaCl, 3 mM EDTA, 0.05% P20 surfactant, and 1% BSA) containing  
376 BA.5.5 or BQ.1.1 RBD protein (Sino Biologicals) ranging from 3.125 to 1,000 nM, followed by a

377 dissociation step in running buffer alone. The BLI signal was recorded and analyzed as a 1:1  
378 binding model with a drifting baseline using BIAevaluation Software (Biacore).

379 **Data availability.** All data supporting the findings of this study are available within the  
380 paper and are available from the corresponding author upon request.

381 **Statistical analysis.** All statistical tests were performed as described in the indicated  
382 figure legends using Prism 9.4.1. Statistical significance was determined using an ANOVA when  
383 comparing three or more groups. When comparing two groups, a Mann-Whitney test was  
384 performed. The number of independent experiments performed are indicated in the relevant  
385 figure legends.

386

387 **REFERENCES**

- 388 1. Halfmann PJ, Iida S, Iwatsuki-Horimoto K, Maemura T, Kiso M, Scheaffer SM, Darling  
389 TL, Joshi A, Loeber S, Singh G, Foster SL, Ying B, Case JB, Chong Z, Whitener B,  
390 Moliva J, Floyd K, Ujie M, Nakajima N, Ito M, Wright R, Uraki R, Warang P, Gagne M,  
391 Li R, Sakai-Tagawa Y, Liu Y, Larson D, Osorio JE, Hernandez-Ortiz JP, Henry AR,  
392 Ciuoderis K, Florek KR, Patel M, Odle A, Wong L-YR, Bateman AC, Wang Z, Edara V-  
393 V, Chong Z, Franks J, Jeevan T, Fabrizio T, DeBeauchamp J, Kercher L, Seiler P,  
394 Gonzalez-Reiche AS, Sordillo EM, Chang LA, van Bakel H, et al. 2022. SARS-CoV-2  
395 Omicron virus causes attenuated disease in mice and hamsters. *Nature*  
396 doi:10.1038/s41586-022-04441-6.  
397
- 398 2. Liu S, Selvaraj P, Sangare K, Luan B, Wang TT. 2022. Spike protein-independent  
399 attenuation of SARS-CoV-2 Omicron variant in laboratory mice. *Cell Reports*  
400 40:111359.  
401
- 402 3. van Doremalen N, Singh M, Saturday TA, Yinda CK, Perez-Perez L, Bohler WF,  
403 Weishampel ZA, Lewis M, Schulz JE, Williamson BN, Meade-White K, Gallogly S,  
404 Okumura A, Feldmann F, Lovaglio J, Hanley PW, Shaia C, Feldmann H, de Wit E,  
405 Munster VJ, Rosenke K. 2022. SARS-CoV-2 Omicron BA.1 and BA.2 are attenuated in  
406 rhesus macaques as compared to Delta. *Science Advances* 8:eade1860.  
407
- 408 4. Hodcroft EB. 2021. “CoVariants: SARS-CoV-2 Mutations and Variants of Interest.”, *on*  
409 GISAID. <https://covariants.org/>. Accessed 2-6-23.  
410
- 411 5. Chen RE, Winkler ES, Case JB, Aziati ID, Bricker TL, Joshi A, Darling TL, Ying B,  
412 Errico JM, Shrihari S, VanBlargan LA, Xie X, Gilchuk P, Zost SJ, Droit L, Liu Z,  
413 Stumpf S, Wang D, Handley SA, Stine WB, Jr., Shi PY, Davis-Gardner ME, Suthar MS,  
414 Knight MG, Andino R, Chiu CY, Ellebedy AH, Fremont DH, Whelan SPJ, Crowe JE, Jr.,  
415 Purcell L, Corti D, Boon ACM, Diamond MS. 2021. In vivo monoclonal antibody  
416 efficacy against SARS-CoV-2 variant strains. *Nature* 596:103-108.  
417
- 418 6. Liu Y, Hu G, Wang Y, Ren W, Zhao X, Ji F, Zhu Y, Feng F, Gong M, Ju X, Zhu Y, Cai  
419 X, Lan J, Guo J, Xie M, Dong L, Zhu Z, Na J, Wu J, Lan X, Xie Y, Wang X, Yuan Z,  
420 Zhang R, Ding Q. 2021. Functional and genetic analysis of viral receptor ACE2 orthologs  
421 reveals a broad potential host range of SARS-CoV-2. *Proc Natl Acad Sci U S A* 118.  
422
- 423 7. Rathnasinghe R, Jangra S, Cupic A, Martínez-Romero C, Mulder LC, Kehrer T, Yildiz S,  
424 Choi A, Mena I, De Vriese J. 2021. The N501Y mutation in SARS-CoV-2 spike leads to  
425 morbidity in obese and aged mice and is neutralized by convalescent and post-  
426 vaccination human sera. *MedRxiv*.  
427
- 428 8. Winkler ES, Chen RE, Alam F, Yildiz S, Case JB, Uccellini MB, Holtzman MJ, Garcia-  
429 Sastre A, Schotsaert M, Diamond MS. 2021. SARS-CoV-2 causes lung infection without  
430 severe disease in human ACE2 knock-in mice. *J Virol* doi:10.1128/JVI.01511-  
431 21:JVI0151121.  
432

- 433 9. Ying B, Whitener B, VanBlargan LA, Hassan AO, Shrihari S, Liang C-Y, Karl CE,  
434 Mackin S, Chen RE, Kafai NM, Wilks SH, Smith DJ, Carreño JM, Singh G, Krammer F,  
435 Carfi A, Elbashir SM, Edwards DK, Thackray LB, Diamond MS. 2021. Protective  
436 activity of mRNA vaccines against ancestral and variant SARS-CoV-2 strains. *Science*  
437 *Translational Medicine* 0:eabm3302.  
438
- 439 10. Winkler ES, Bailey AL, Kafai NM, Nair S, McCune BT, Yu J, Fox JM, Chen RE,  
440 Earnest JT, Keeler SP, Ritter JH, Kang LI, Dort S, Robichaud A, Head R, Holtzman MJ,  
441 Diamond MS. 2020. SARS-CoV-2 infection of human ACE2-transgenic mice causes  
442 severe lung inflammation and impaired function. *Nat Immunol* 21:1327-1335.  
443
- 444 11. Oladunni FS, Park J-G, Pino PA, Gonzalez O, Akhter A, Allué-Guardia A, Olmo-  
445 Fontánez A, Gautam S, Garcia-Vilanova A, Ye C, Chiem K, Headley C, Dwivedi V,  
446 Parodi LM, Alfson KJ, Staples HM, Schami A, Garcia JI, Whigham A, Platt RN, Gazi M,  
447 Martinez J, Chuba C, Earley S, Rodriguez OH, Mdaki SD, Kavelish KN, Escalona R,  
448 Hallam CRA, Christie C, Patterson JL, Anderson TJC, Carrion R, Dick EJ, Hall-Ursone  
449 S, Schlesinger LS, Alvarez X, Kaushal D, Giavedoni LD, Turner J, Martinez-Sobrido L,  
450 Torrelles JB. 2020. Lethality of SARS-CoV-2 infection in K18 human angiotensin-  
451 converting enzyme 2 transgenic mice. *Nature Communications* 11:6122.  
452
- 453 12. Sia SF, Yan L-M, Chin AWH, Fung K, Choy K-T, Wong AYL, Kaewpreedee P, Perera  
454 RAPM, Poon LLM, Nicholls JM, Peiris M, Yen H-L. 2020. Pathogenesis and  
455 transmission of SARS-CoV-2 in golden hamsters. *Nature* 583:834-838.  
456
- 457 13. Boon ACM, Darling TL, Halfmann PJ, Franks J, Webby RJ, Barouch DH, Port JR,  
458 Munster VJ, Diamond MS, Kawaoka Y. 2022. Reduced airborne transmission of SARS-  
459 CoV-2 BA.1 Omicron virus in Syrian hamsters. *PLOS Pathogens* 18:e1010970.  
460
- 461 14. Case JB, Mackin S, Errico JM, Chong Z, Madden EA, Whitener B, Guarino B, Schmid  
462 MA, Rosenthal K, Ren K, Dang HV, Snell G, Jung A, Droit L, Handley SA, Halfmann  
463 PJ, Kawaoka Y, Crowe JE, Fremont DH, Virgin HW, Loo Y-M, Esser MT, Purcell LA,  
464 Corti D, Diamond MS. 2022. Resilience of S309 and AZD7442 monoclonal antibody  
465 treatments against infection by SARS-CoV-2 Omicron lineage strains. *Nature*  
466 *Communications* 13:3824.  
467
- 468 15. Li L, Liao H, Meng Y, Li W, Han P, Liu K, Wang Q, Li D, Zhang Y, Wang L, Fan Z,  
469 Zhang Y, Wang Q, Zhao X, Sun Y, Huang N, Qi J, Gao GF. 2022. Structural basis of  
470 human ACE2 higher binding affinity to currently circulating Omicron SARS-CoV-2 sub-  
471 variants BA.2 and BA.1.1. *Cell* 185:2952-2960.e10.  
472
- 473 16. Wang Q, Iketani S, Li Z, Liu L, Guo Y, Huang Y, Bowen AD, Liu M, Wang M, Yu J,  
474 Valdez R, Lauring AS, Sheng Z, Wang HH, Gordon A, Liu L, Ho DD. 2023. Alarming  
475 antibody evasion properties of rising SARS-CoV-2 BQ and XBB subvariants. *Cell*  
476 186:279-286.e8.  
477

- 478 17. McCray PB, Pewe L, Wohlford-Lenane C, Hickey M, Manzel L, Shi L, Netland J, Jia  
479 HP, Halabi C, Sigmund CD, Meyerholz DK, Kirby P, Look DC, Perlman S. 2007. Lethal  
480 Infection of K18-*hACE2* Mice Infected with Severe Acute Respiratory Syndrome  
481 Coronavirus. *Journal of Virology* 81:813-821.  
482
- 483 18. Darling TL, Ying B, Whitener B, VanBlargan LA, Bricker TL, Liang C-Y, Joshi A,  
484 Bamunuarachchi G, Seehra K, Schmitz AJ, Halfmann PJ, Kawaoka Y, Elbashir SM,  
485 Edwards DK, Thackray LB, Diamond MS, Boon ACM. 2022. mRNA-1273 and  
486 Ad26.COV2.S vaccines protect against the B.1.621 variant of SARS-CoV-2. *Med* 3:309-  
487 324.e6.  
488
- 489 19. Ito J, Suzuki R, Uriu K, Itakura Y, Zahradnik J, Deguchi S, Wang L, Lytras S, Tamura T,  
490 Kida I, Nasser H, Shofa M, Begum MM, Tsuda M, Oda Y, Fujita S, Yoshimatsu K, Ito  
491 H, Nao N, Asakura H, Nagashima M, Sadamasu K, Yoshimura K, Yamamoto Y,  
492 Nagamoto T, Schreiber G, Saito A, Matsuno K, Takayama K, Tanaka S, Fukuhara T,  
493 Ikeda T, Sato K. 2022. Convergent evolution of the SARS-CoV-2 Omicron subvariants  
494 leading to the emergence of BQ.1.1 variant. *bioRxiv*  
495 doi:10.1101/2022.12.05.519085:2022.12.05.519085.  
496
- 497 20. Zang R, Gomez Castro MF, McCune BT, Zeng Q, Rothlauf PW, Sonnek NM, Liu Z,  
498 Brulois KF, Wang X, Greenberg HB, Diamond MS, Ciorba MA, Whelan SPJ, Ding S.  
499 2020. Tmprss2 and Tmprss4 promote SARS-CoV-2 infection of human small  
500 intestinal enterocytes. *Sci Immunol* 5.  
501
- 502 21. Chen RE, Zhang X, Case JB, Winkler ES, Liu Y, VanBlargan LA, Liu J, Errico JM, Xie  
503 X, Suryadevara N, Gilchuk P, Zost SJ, Tahan S, Droit L, Turner JS, Kim W, Schmitz AJ,  
504 Thapa M, Wang D, Boon ACM, Presti RM, O'Halloran JA, Kim AHJ, Deepak P, Pinto  
505 D, Fremont DH, Crowe JE, Jr., Corti D, Virgin HW, Ellebedy AH, Shi PY, Diamond  
506 MS. 2021. Resistance of SARS-CoV-2 variants to neutralization by monoclonal and  
507 serum-derived polyclonal antibodies. *Nat Med* doi:10.1038/s41591-021-01294-w.  
508
- 509 22. Case JB, Bailey AL, Kim AS, Chen RE, Diamond MS. 2020. Growth, detection,  
510 quantification, and inactivation of SARS-CoV-2. *Virology* 548:39-48.  
511
- 512 23. Case JB, Rothlauf PW, Chen RE, Liu Z, Zhao H, Kim AS, Bloyet LM, Zeng Q, Tahan S,  
513 Droit L, Ilagan MXG, Tartell MA, Amarasinghe G, Henderson JP, Miersch S, Ustav M,  
514 Sidhu S, Virgin HW, Wang D, Ding S, Corti D, Theel ES, Fremont DH, Diamond MS,  
515 Whelan SPJ. 2020. Neutralizing Antibody and Soluble ACE2 Inhibition of a Replication-  
516 Competent VSV-SARS-CoV-2 and a Clinical Isolate of SARS-CoV-2. *Cell Host*  
517 *Microbe* 28:475-485.e5.  
518
- 519



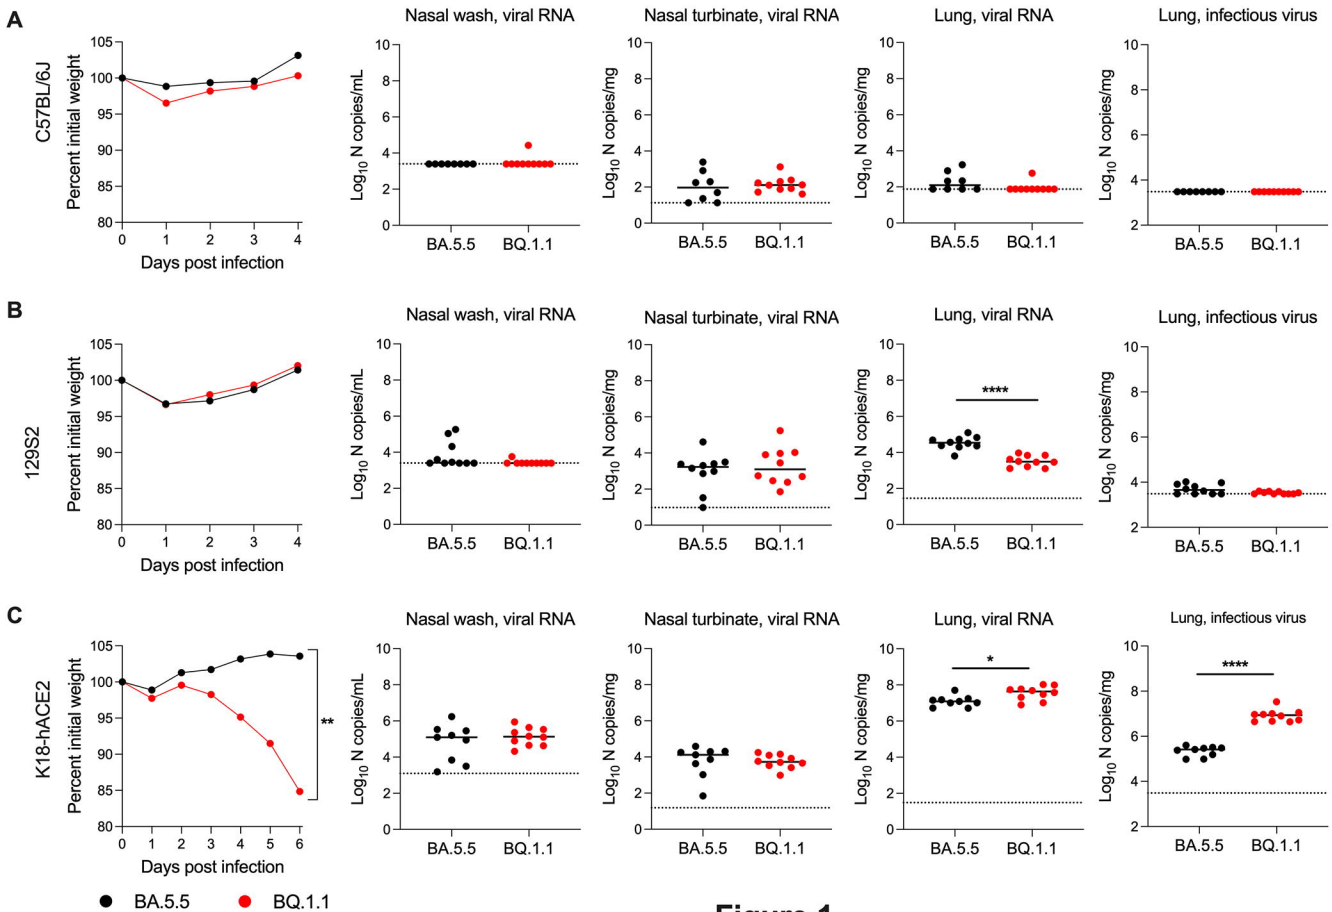

**Figure 1**

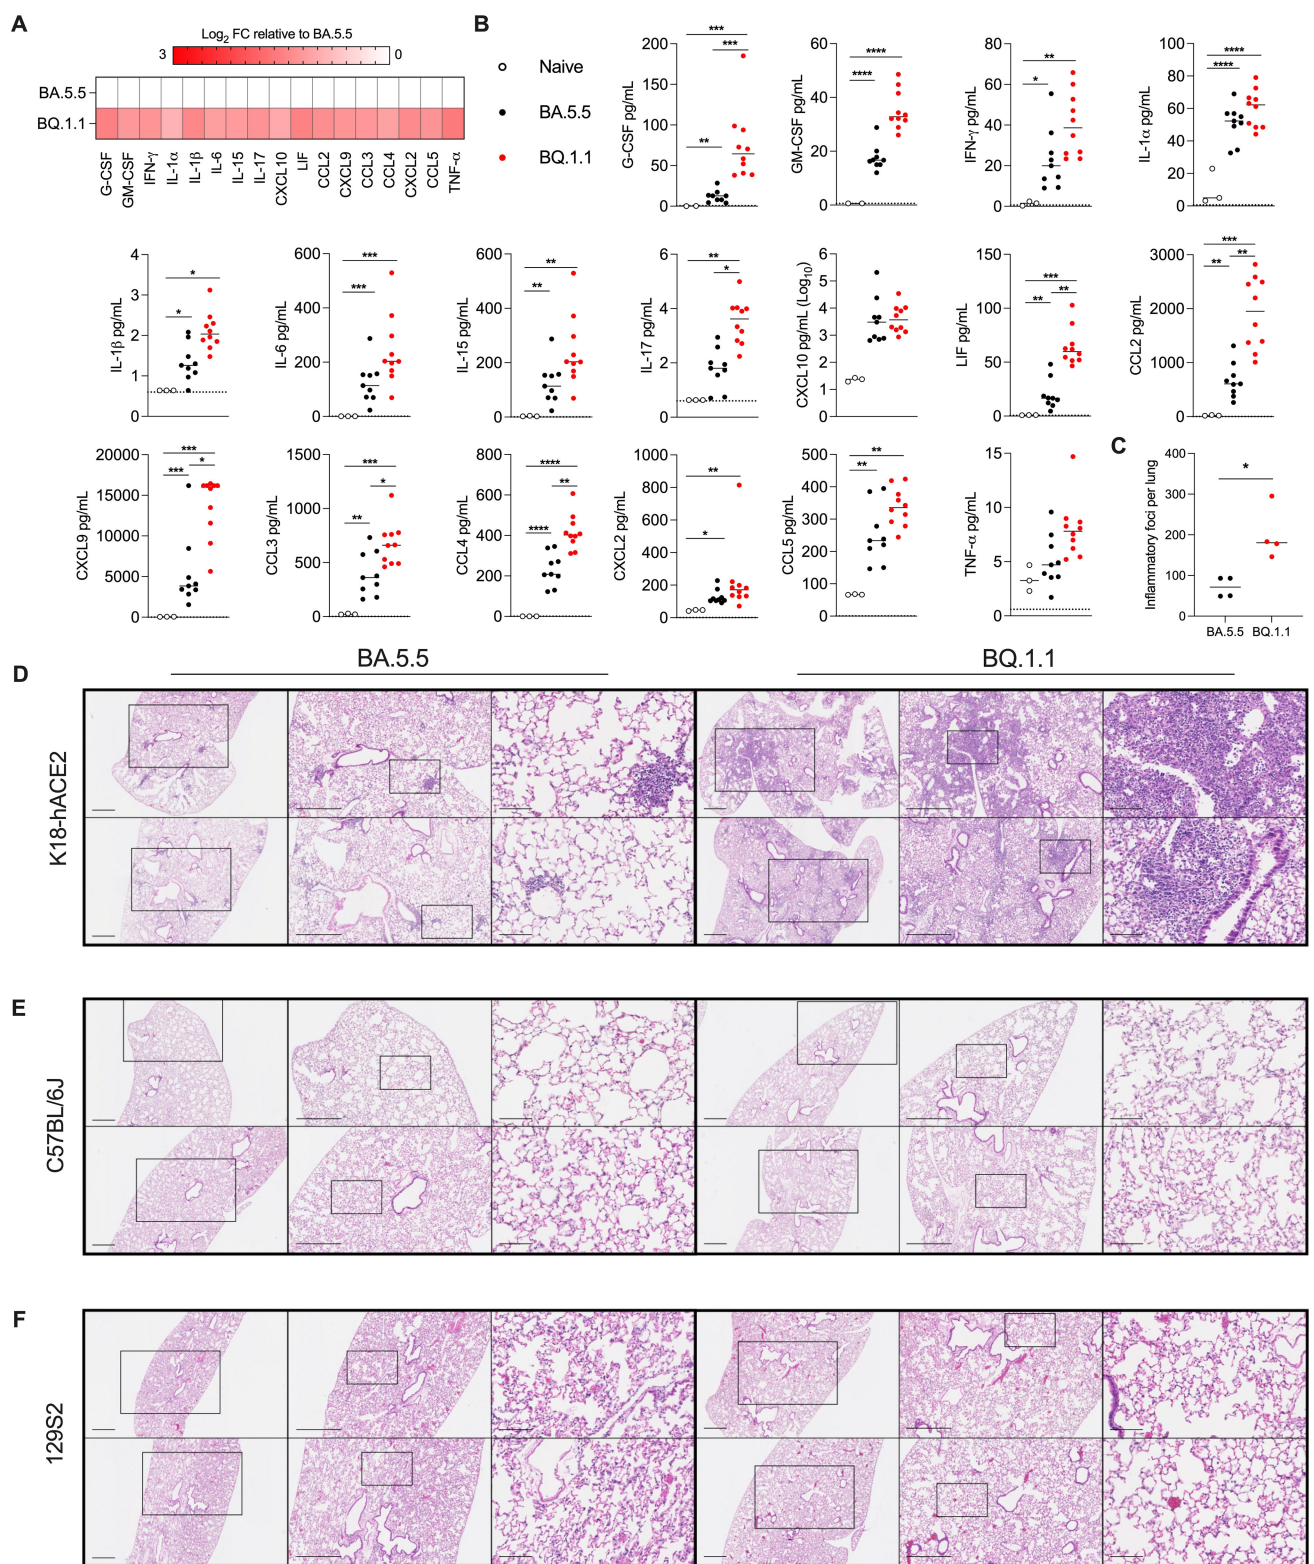

**Figure 2**

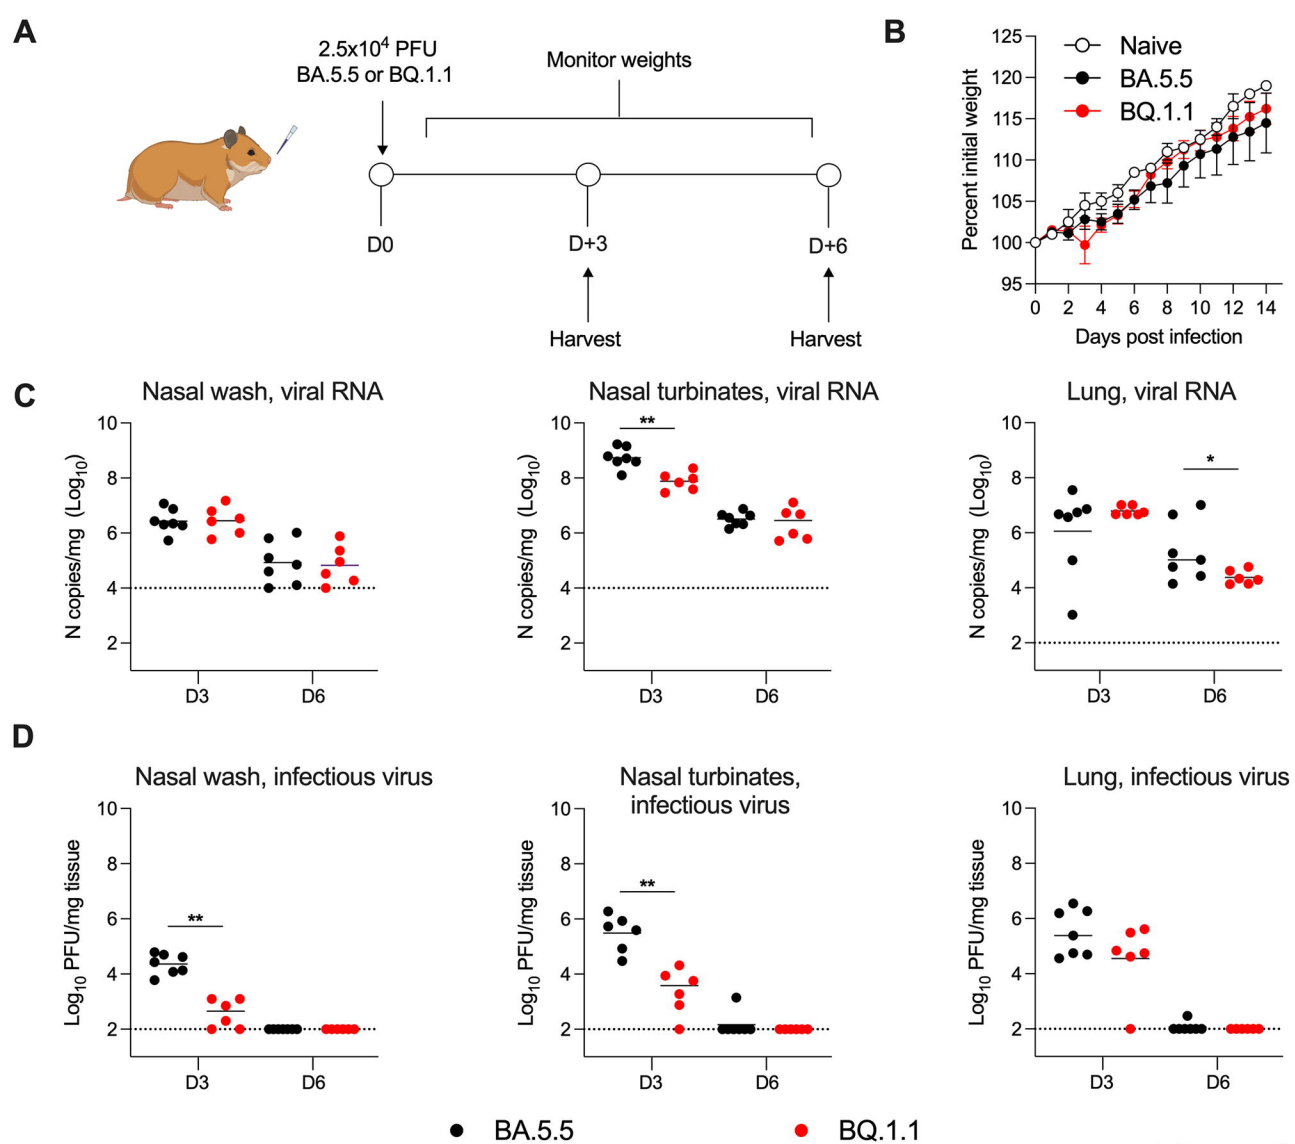

**Figure 3**

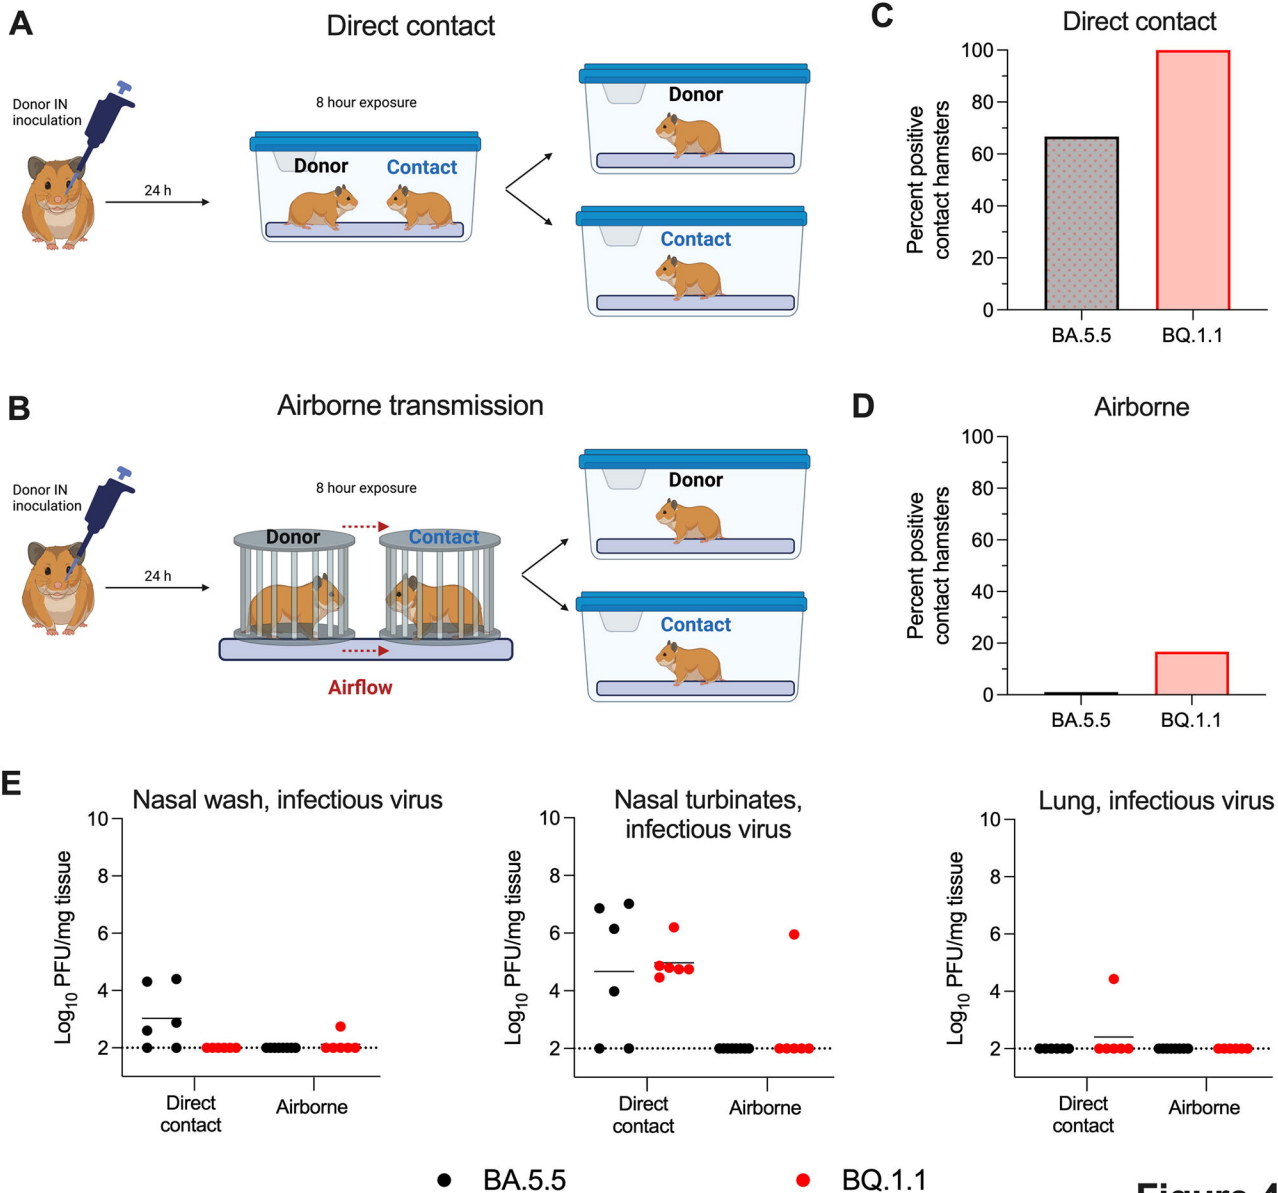

**Figure 4**

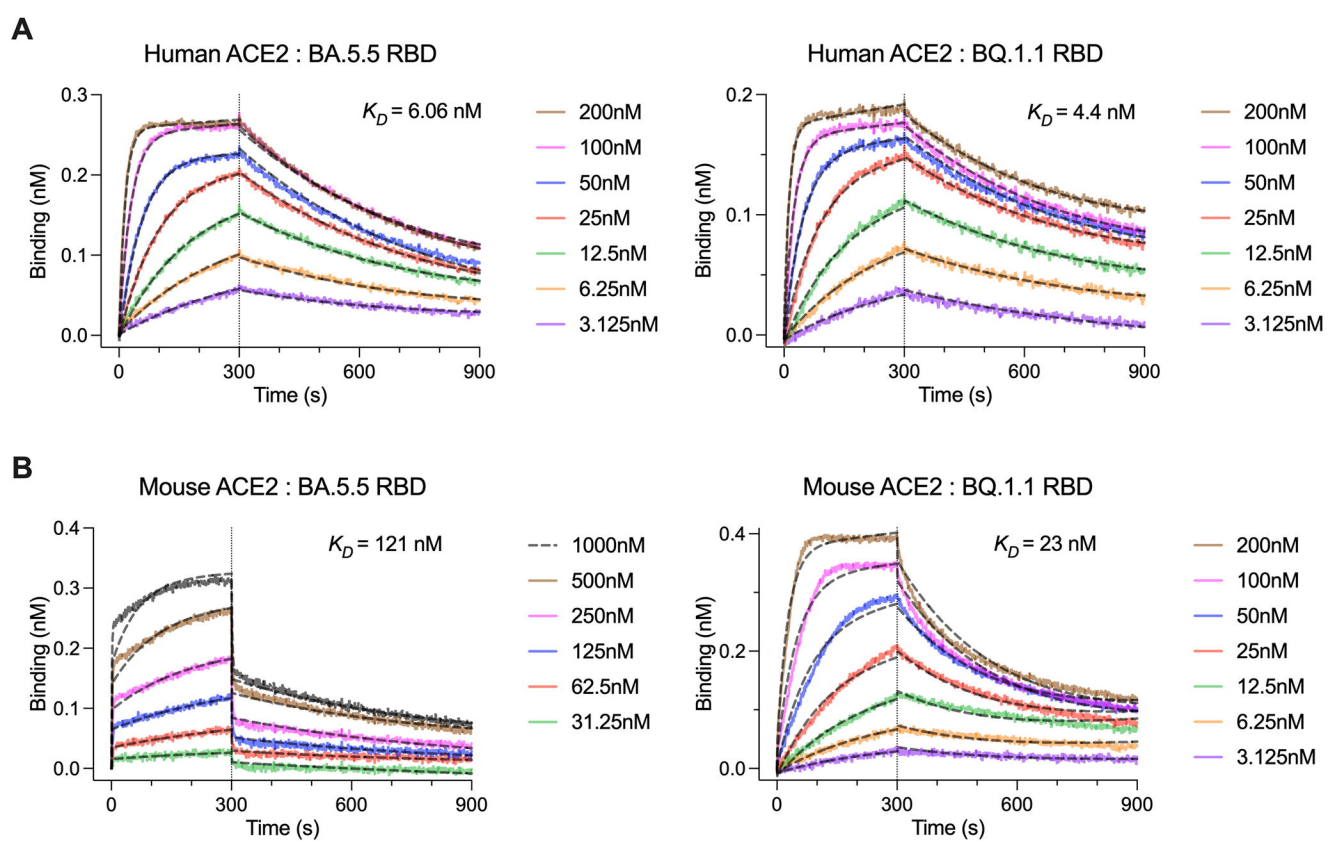

**C**

| ACE2  | RBD    | $k_a$ ( $\times 10^4/\text{Ms}$ ) | $k_d$ ( $\times 10^{-3}/\text{s}$ ) | $K_D$ (nM)     |
|-------|--------|-----------------------------------|-------------------------------------|----------------|
| Human | BA.5.5 | $32.8 \pm 0.05$                   | $1.99 \pm 0.02$                     | $6.0 \pm 0.06$ |
| Human | BQ.1.1 | $38.9 \pm 1.0$                    | $1.72 \pm 0.2$                      | $4.4 \pm 0.75$ |
| Mouse | BA.5.5 | $1.44 \pm 0.09$                   | $1.75 \pm 0.09$                     | $121 \pm 1.5$  |
| Mouse | BQ.1.1 | $17.0 \pm 0.4$                    | $3.97 \pm 0.2$                      | $23 \pm 0.7$   |

**Figure 5**
